# Supplementary material for: Sex disparities in the association between rare earth elements exposure and genetic mutation frequencies in lung cancer patients
Source: Springer Nature journal article supplement (doi:10.1038/s41598-024-79580-z), 2025-01-16
Supplement: MOESM1 [file 41598_2024_79580_MOESM1_ESM.pdf]

1 Supplemental figures

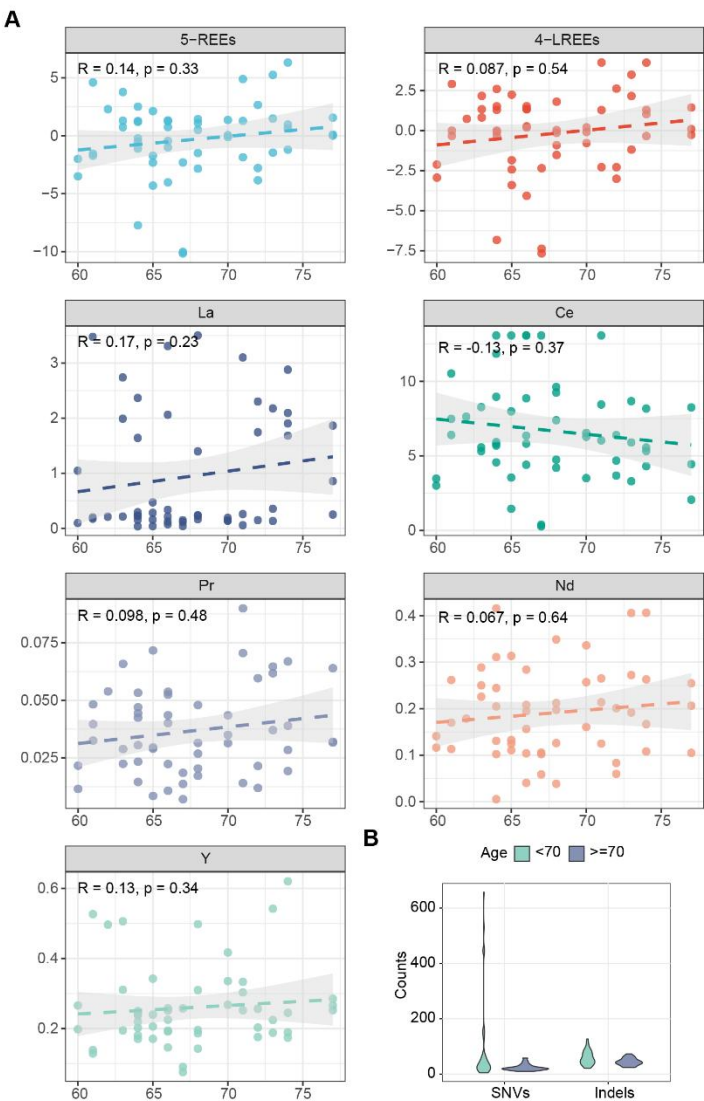

2

3 **Figure S1.** Correlations between age and the five individual REEs, the sum of scaled REE  
4 concentrations of the five REEs (5-REEs), and the four light REEs (4-LREEs) **(A)**. Comparison of SNV  
5 and indel number between younger (60-70 yrs) and elder (71-80 yrs) patients **(B)**.
